# Supplementary material for: Activation pathway of a G protein-coupled receptor uncovers conformational intermediates as targets for allosteric drug design
Source: PubMed Central journal article supplement (PMC8342441; doi:10.1038/s41467-021-25020-9), 2021-08-05
Supplement: 41467_2021_25020_MOESM3_ESM.pdf [file 41467_2021_25020_MOESM3_ESM.pdf]

### **Description of Additional Supplementary Files**

File Name: Supplementary Data 1

Description: Sequences of all the primers used for site-directed mutagenesis in this study.

File Name: Supplementary Data 2

Description: Summary of current reported class A GPCR (Data were collected at April 26, 2021).
